# Supplementary material for: Synthesis of ethane-disulfonate pillared layered cobalt hydroxide towards the electrocatalytic oxygen evolution reaction
Source: Royal Society of Chemistry journal article supplement (doi:10.1039/d2dt03358e), 2023-01-01
Supplement: d2dt03358e1.pdf [file d2dt03358e1.pdf]

## Electronic Supplementary Information

# Synthesis of Ethane-disulfonate Pillared Layered Cobalt Hydroxide towards Electrocatalytic Oxygen Evolution Reaction

Jianbo Liang\*, Hang Zu, Huiling Si, Yanhong Ma and Mengyao Li  
Department of Chemistry, Capital Normal University, Beijing, P.R. China  
\*Email:liangjianbo@cnu.edu.cn

**Figure S1.** SEM images of the Co-C2 sample;

**Figure S2.** A geometry illustration of the ethane-disulfonate molecule;

**Figure S3.** The full XPS spectrum of the Co-C2 sample;

**Figure S4.** FT-IR spectra of the Co-C2 sample and sodium ethane-disulfonate;

**Figure S5.** Thermogravimetric data of the Co-C2 sample;

**Figure S6.** The CV curves of the Co-C2 sample in the activation;

**Figure S7.** A chronopotentiometry measurement of Co-C2 sample;

**Figure S8.** The Raman spectra of the sample collected after each round of CV scanning;

**Figure S9.** In-situ Raman spectra of the sample after activation;

**Figure S10.** The  $^1\text{H}$  nuclear magnetic resonance ( $^1\text{H-NMR}$ ) spectrum of the sodium ethane-disulfonate;

**Table S1.** The refined structure parameters of the Co-C2 sample.

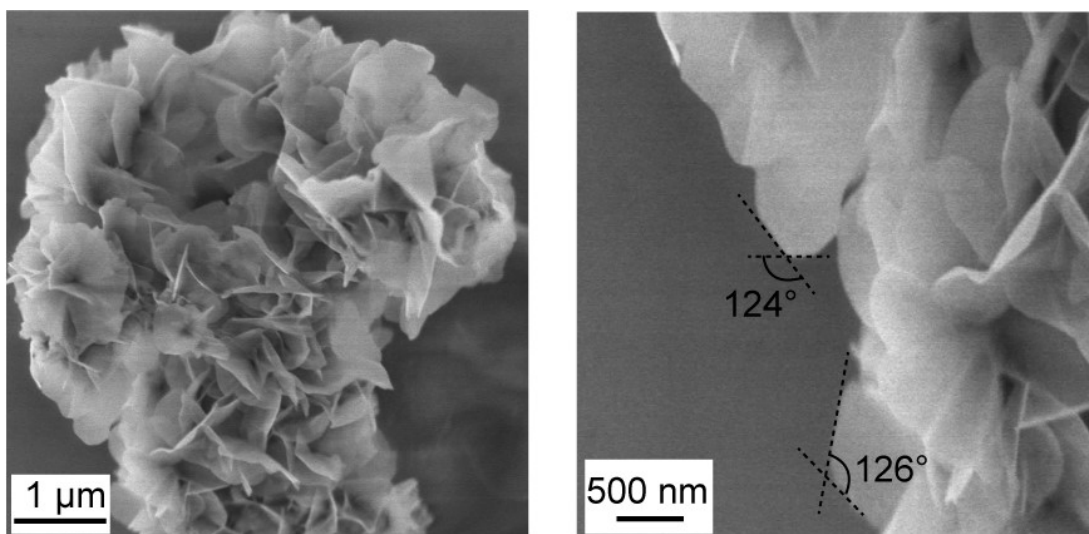

**Figure S1.** SEM images of the Co-C2 sample.

The Co-C2 sample comprises aggregates of nanosheets with a lateral size of 1~2 μm. The thickness of nanosheets is about tens of nanometers. Some nanosheets show well-developed edges. The angle between the neighboring edges was close to 120 degree.

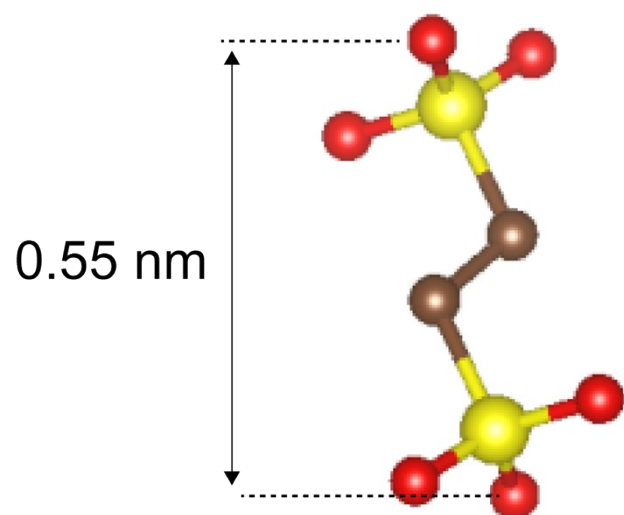

**Figure S2.** A geometry illustration of the ethane-disulfonate molecule (H atoms are omitted).

The axis length of the molecule is estimated by the distance of oxygen atoms at the two ends.

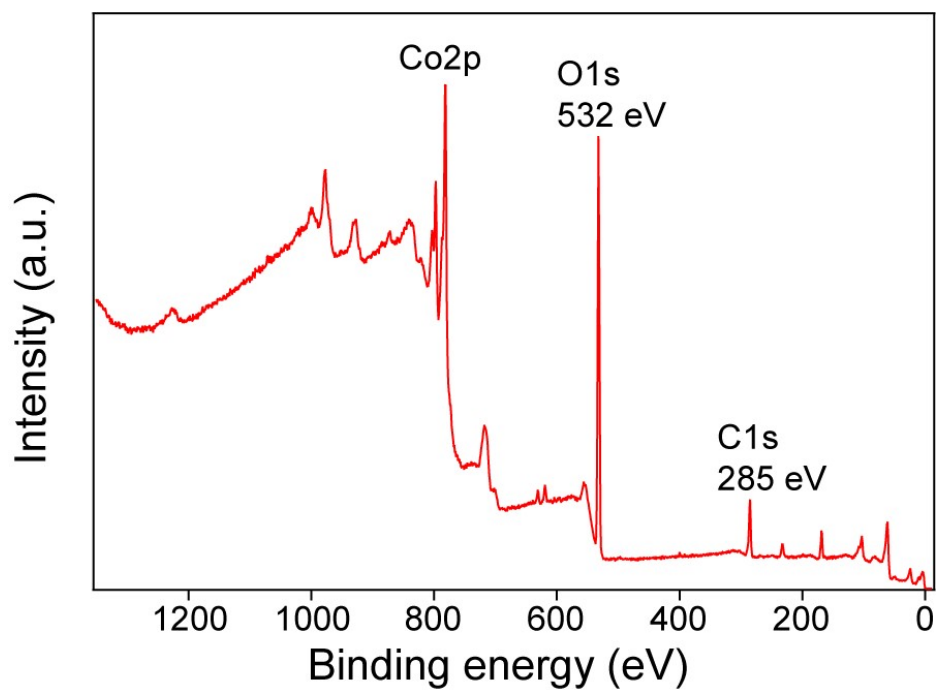

**Figure S3.** The full XPS spectrum of the Co-C2 sample.

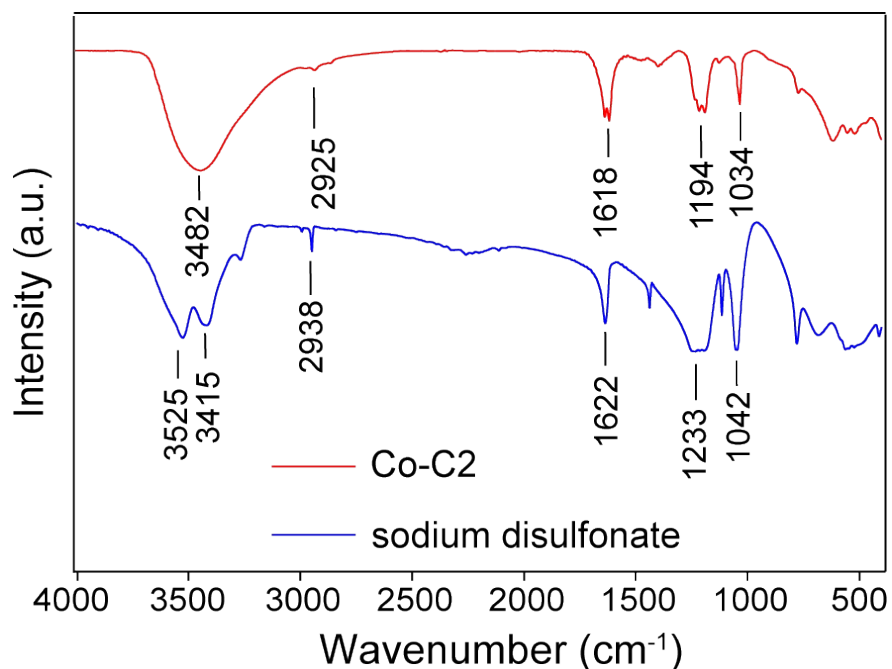

**Figure S4.** FT-IR spectra of the Co-C2 sample and sodium salt of ethane-disulfonate.

For the Co-C2 sample (the red curve), the broad band centered at 3482  $\text{cm}^{-1}$  corresponds to the stretching vibration of O-H from the hydroxyl groups and water molecules. The band at 1618  $\text{cm}^{-1}$  is the bending vibration of water. The peaks at 2925  $\text{cm}^{-1}$  is assigned to the stretching vibration of C-H. The bands in range of 1000~1200  $\text{cm}^{-1}$  are attributed to the vibrations of the  $\text{SO}_3$  group. The bands at 1194 and 1304  $\text{cm}^{-1}$  are attributed to the vibration of S=O from the sulfonate group. Compared to sodium salt of ethane-disulfonate (the blue curve), the Co-C2 sample shows a red-shifted of 39  $\text{cm}^{-1}$  for the S=O vibration, which may be attributed from the chemical interactions between the sulfonate groups and  $\text{Co}_{\text{Td}}$  ions.

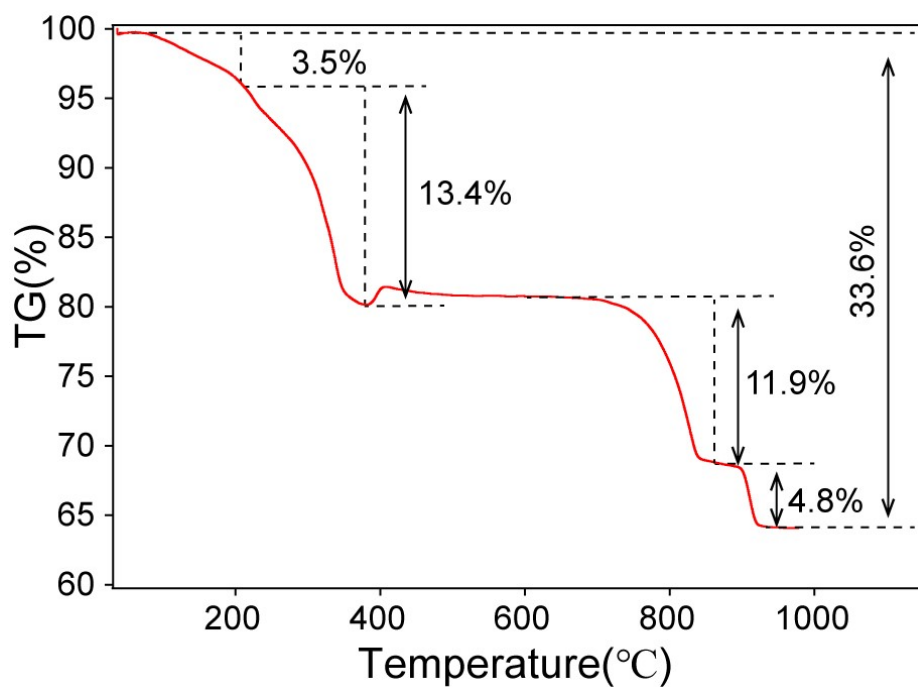

**Figure S5.** Thermogravimetric data of the Co-C2 sample.

In the measurement, the sample is heated from the room temperature to 1000°C at a rate of 5 degree per minute. The total weight loss of the sample is calculated as 33.6%. The final product is determined as CoO. The cobalt content in the solid is calculated as 47.5%, which is consistent with the value determined by chemical analysis.

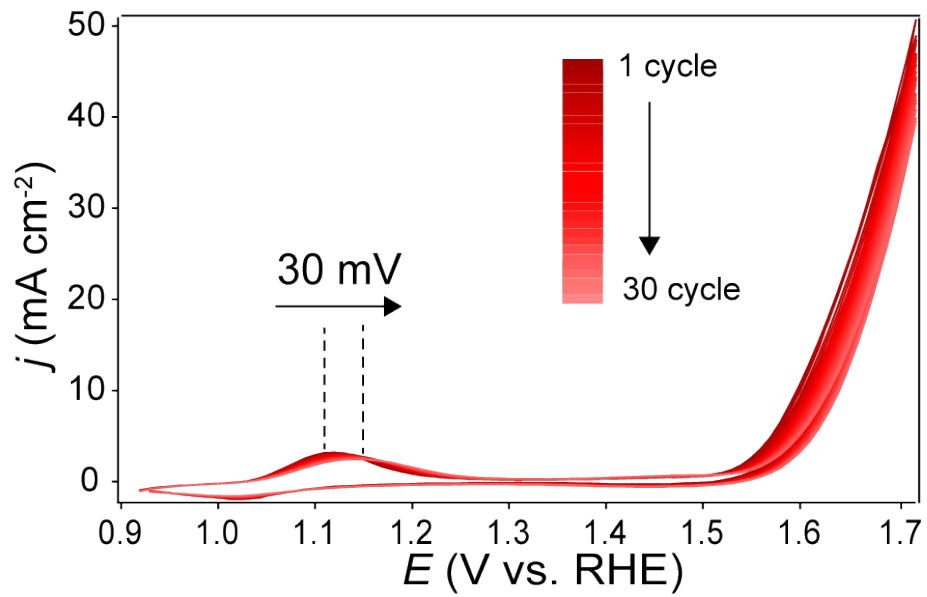

**Figure S6.** The CV curves of the Co-C2 sample in the activation.

The CV curves came to steady after 20 circles. LSV curves are acquired after scanned for 30 CV circles.

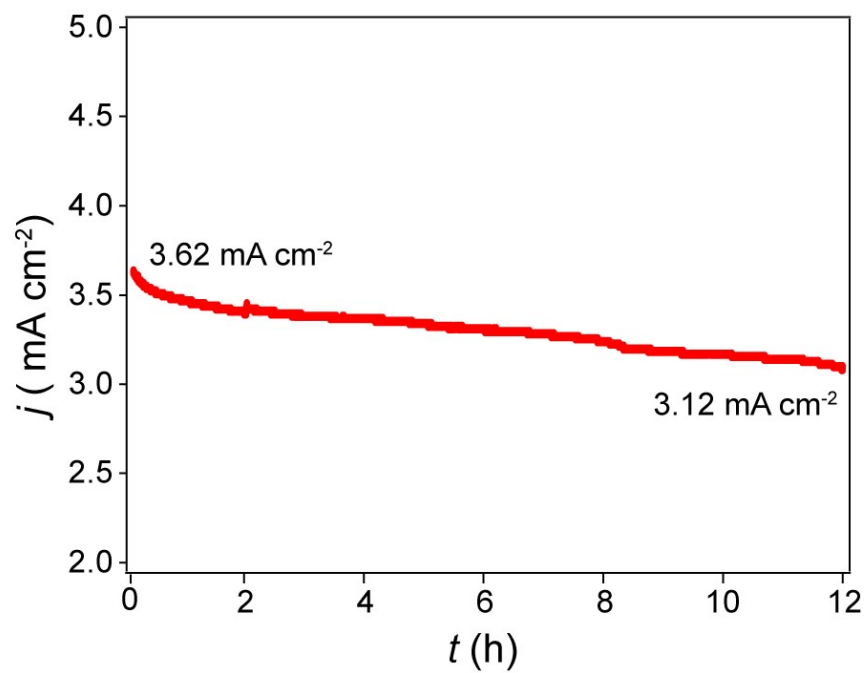

**Figure S7.** The chronopotentiometry measurement of the Co-C2 sample at the overpotential of 350 mV.

The initial current density was 3.62  $\text{mA/cm}^2$ . The value dropped to 3.12  $\text{mA/cm}^2$  after working 12 hours.



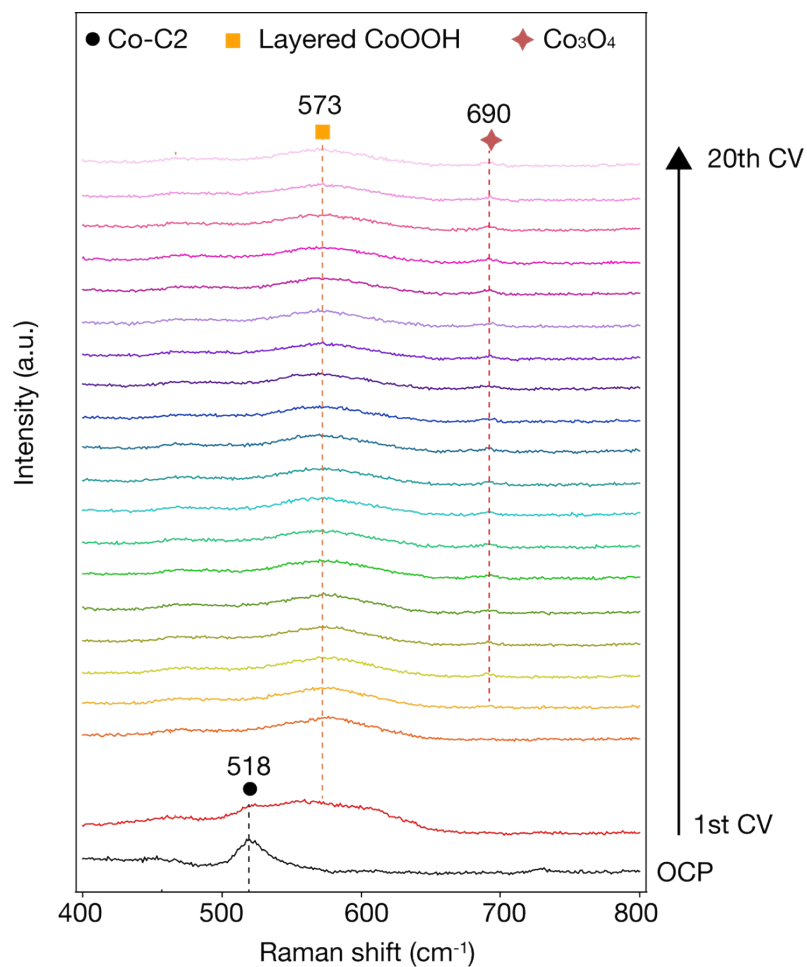

**Figure S8.** The Raman spectra of the sample collected after each round of CV scanning.

Two main Raman peaks at  $518\text{ cm}^{-1}$  can be assigned to the vibrations of Co(II)-O in the Co-C2 sample. The peak appeared at  $573\text{ cm}^{-1}$  after the second CV scan can be associated with the layered CoOOH. The weak peak at  $690\text{ cm}^{-1}$  is assigned as  $\text{Co}_3\text{O}_4$ . Trace amount of  $\text{Co}_3\text{O}_4$  was detected after the sample was cycled by twenty rounds of CV scanning.

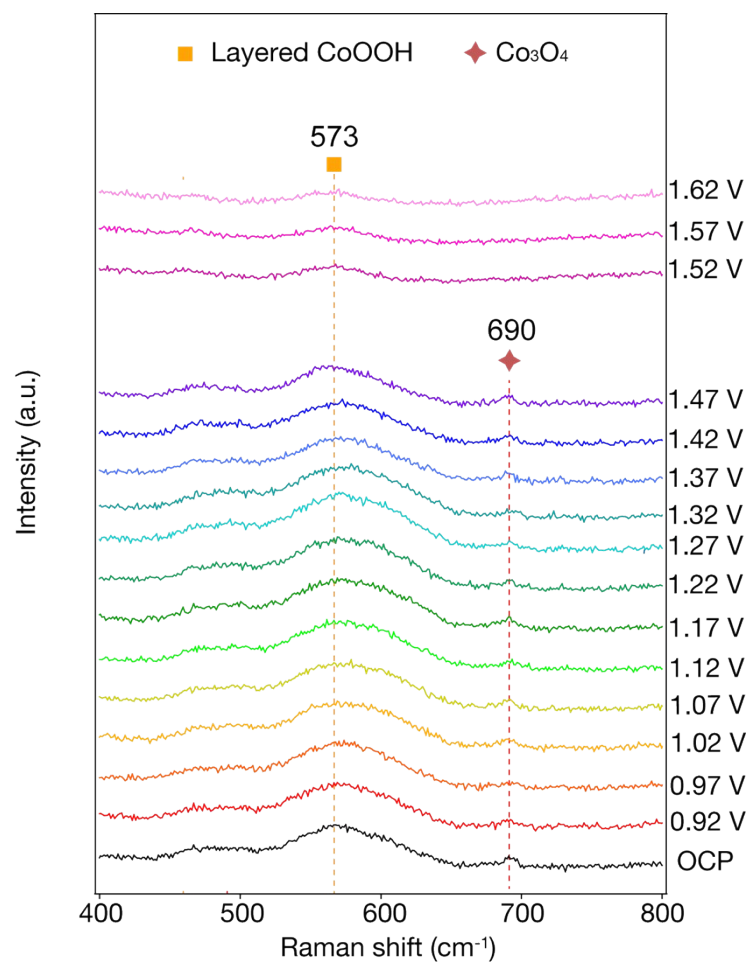

**Figure S9.** In-situ Raman spectra of the activated catalyst with respect to increasing potential. The peak at the  $573\text{ cm}^{-1}$  is assigned as layered CoOOH. The peak at  $490\text{ cm}^{-1}$  is assigned to the spinel  $\text{Co}_3\text{O}_4$ .

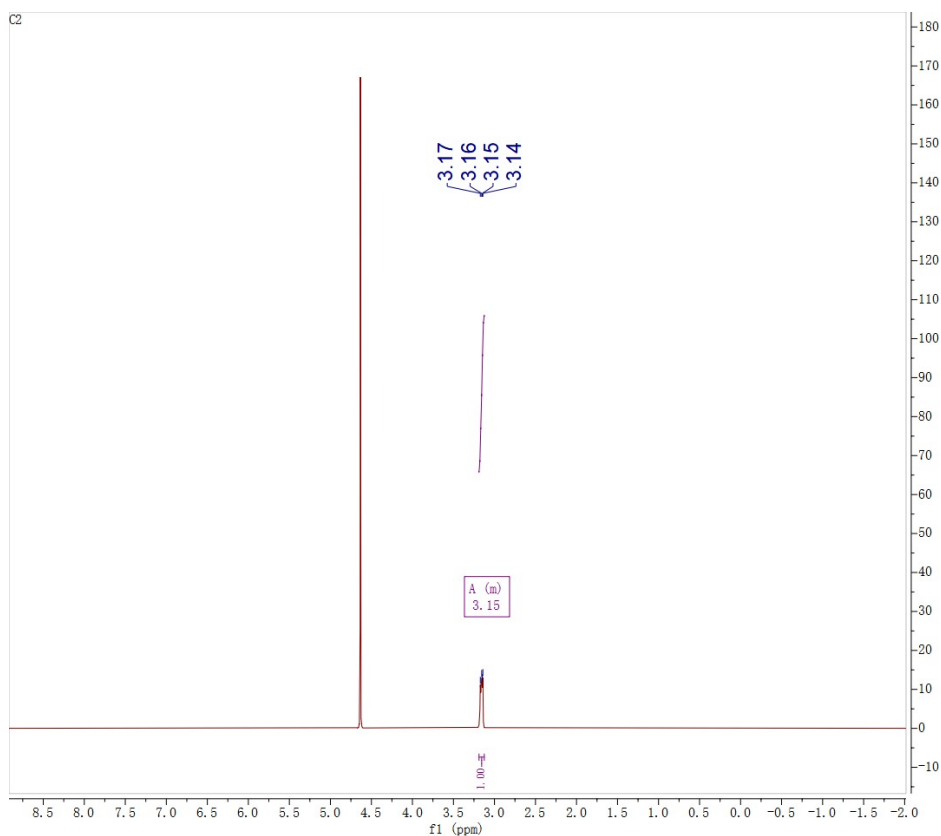

**Figure S10.** The  $\text{H}^1$  nuclear magnetic resonance (H-NMR) spectrum of the sodium salt of ethane- disulfonate.

The peaks at around 3 ppm are attributed to the H in the sodium ethane- disulfonate. This spectrum confirms the purity of the sample.

**Table S1.** Refined structure parameters of the Co-C2 sample.

| atom | X       | Y      | Z       | B     | Occupation |
|------|---------|--------|---------|-------|------------|
| Co1  | 0.5000  | 0.5000 | 0.0000  | 0.628 | 1.0        |
| Co2  | 0.1505  | 0.1717 | -0.0293 | 1.098 | 1.0        |
| Co3  | 0.6671  | 0.1471 | 0.0105  | 0.000 | 1.0        |
| Co4  | 0.0419  | 0.5092 | 0.1245  | 9.251 | 1.0        |
| O1   | 0.6937  | 0.3924 | -0.0454 | 0.000 | 1.0        |
| O2   | -0.4261 | 0.7084 | 0.1382  | 0.001 | 1.0        |
| O3   | 0.8656  | 0.0220 | -0.0973 | 0.087 | 1.0        |
| O4   | 0.4496  | 0.2670 | 0.0449  | 0.000 | 1.0        |
| O5   | 0.3800  | 0.0532 | -0.1878 | 0.000 | 1.0        |
| O6   | 0.9783  | 0.2672 | 0.1839  | 0.006 | 1.0        |
| C1   | 0.406   | 0.0753 | -0.5217 | 0.000 | 1.0        |
| S1   | 0.1803  | 0.1591 | -0.563  | 0.000 | 1.0        |
| O7   | 0.7109  | 0.3798 | -0.4501 | 0.000 | 1.0        |
| O8   | -0.0134 | 0.3043 | -0.5075 | 2.235 | 1.0        |
| O9   | 0.1801  | 0.1912 | -0.4309 | 0.000 | 1.0        |

Space group: P-1;

Cell Parameters:  $a = 6.37682 \text{ \AA}$ ,  $b = 8.42837 \text{ \AA}$ ,  $c = 9.79597 \text{ \AA}$ ,  $\alpha = 97.099^\circ$ ,  $\beta = 98.881^\circ$ ,  $\gamma = 99.604^\circ$ ;

$R_p = 0.078$ ,  $R_{wp} = 0.103$ ,  $R_b = 0.069$ ,  $R_f = 0.063$

See Ref 34 in the main text for the meaning of the factors of  $R_p$ ,  $R_{wp}$ ,  $R_b$  and  $R_f$  in refining XRD data.

1  $\mu$  m
